# Supplementary material
Source: PubMed Central journal article supplement (PMC9161643)
Supplement: NIHMS1777895-supplement-2.pdf [file NIHMS1777895-supplement-2.pdf]

## Supplementary Figure S2

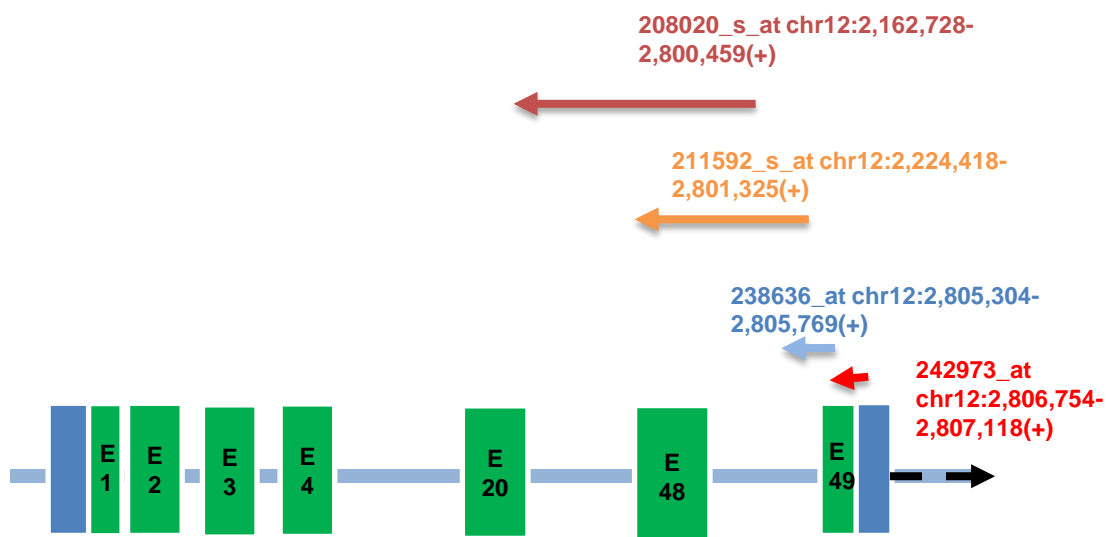

**Location: chr12:2,162,416-2,807,115**

- Transcript (Including UTRs)  
Position: **hg19 chr12:2,162,416-2,807,115** Size: 644,700 Total Exon Count: 50 Strand: +.
- Coding Region  
Position: **hg19 chr12:2,162,729-2,800,365** Size: 637,637 Coding Exon Count: 50.
