# Supplementary material
Source: PubMed Central journal article supplement (PMC9161643)

# Supplementary Figure S1

(A)

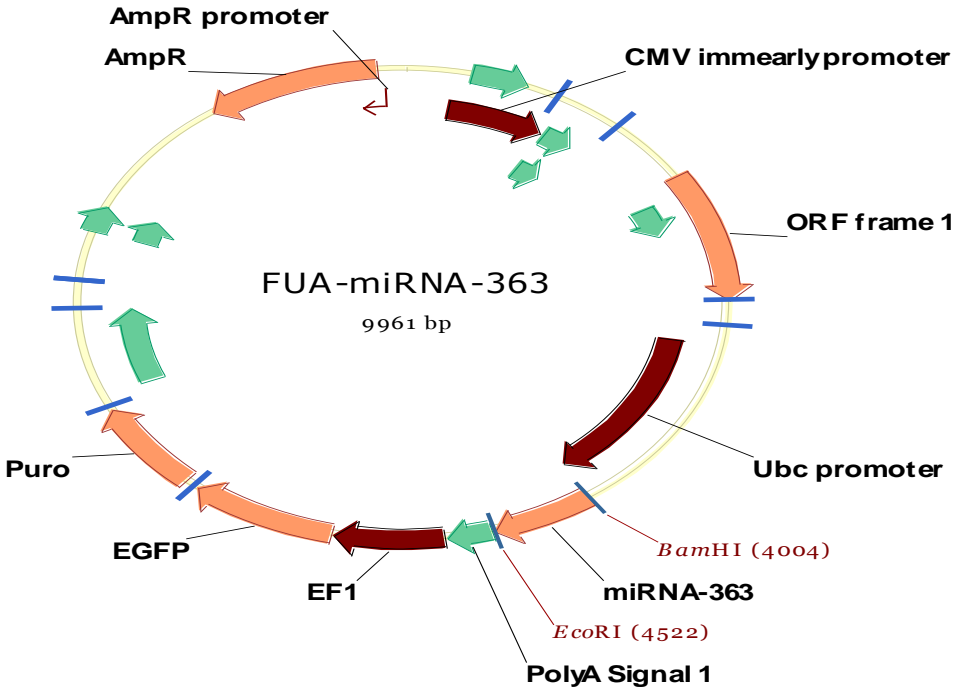

(B)

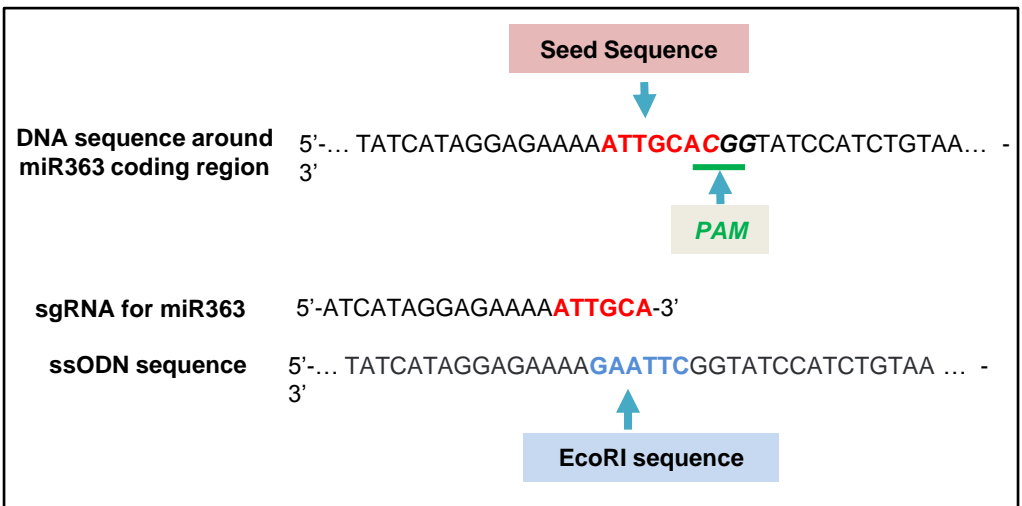

Supplement: NIHMS1777895-supplement-1.pdf [file NIHMS1777895-supplement-1.pdf]

# Supplementary Figure S3

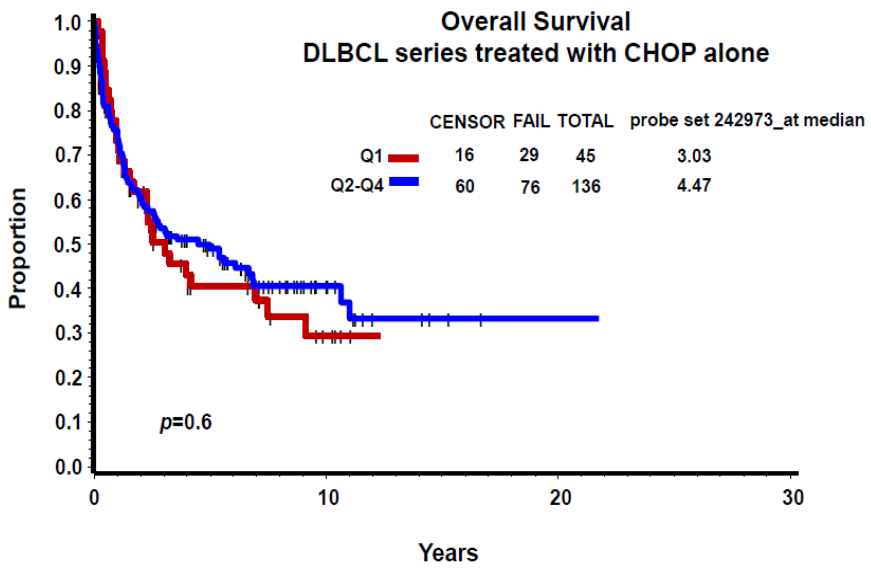

Supplement: NIHMS1777895-supplement-3.pdf [file NIHMS1777895-supplement-3.pdf]

# Supplementary Figure S4

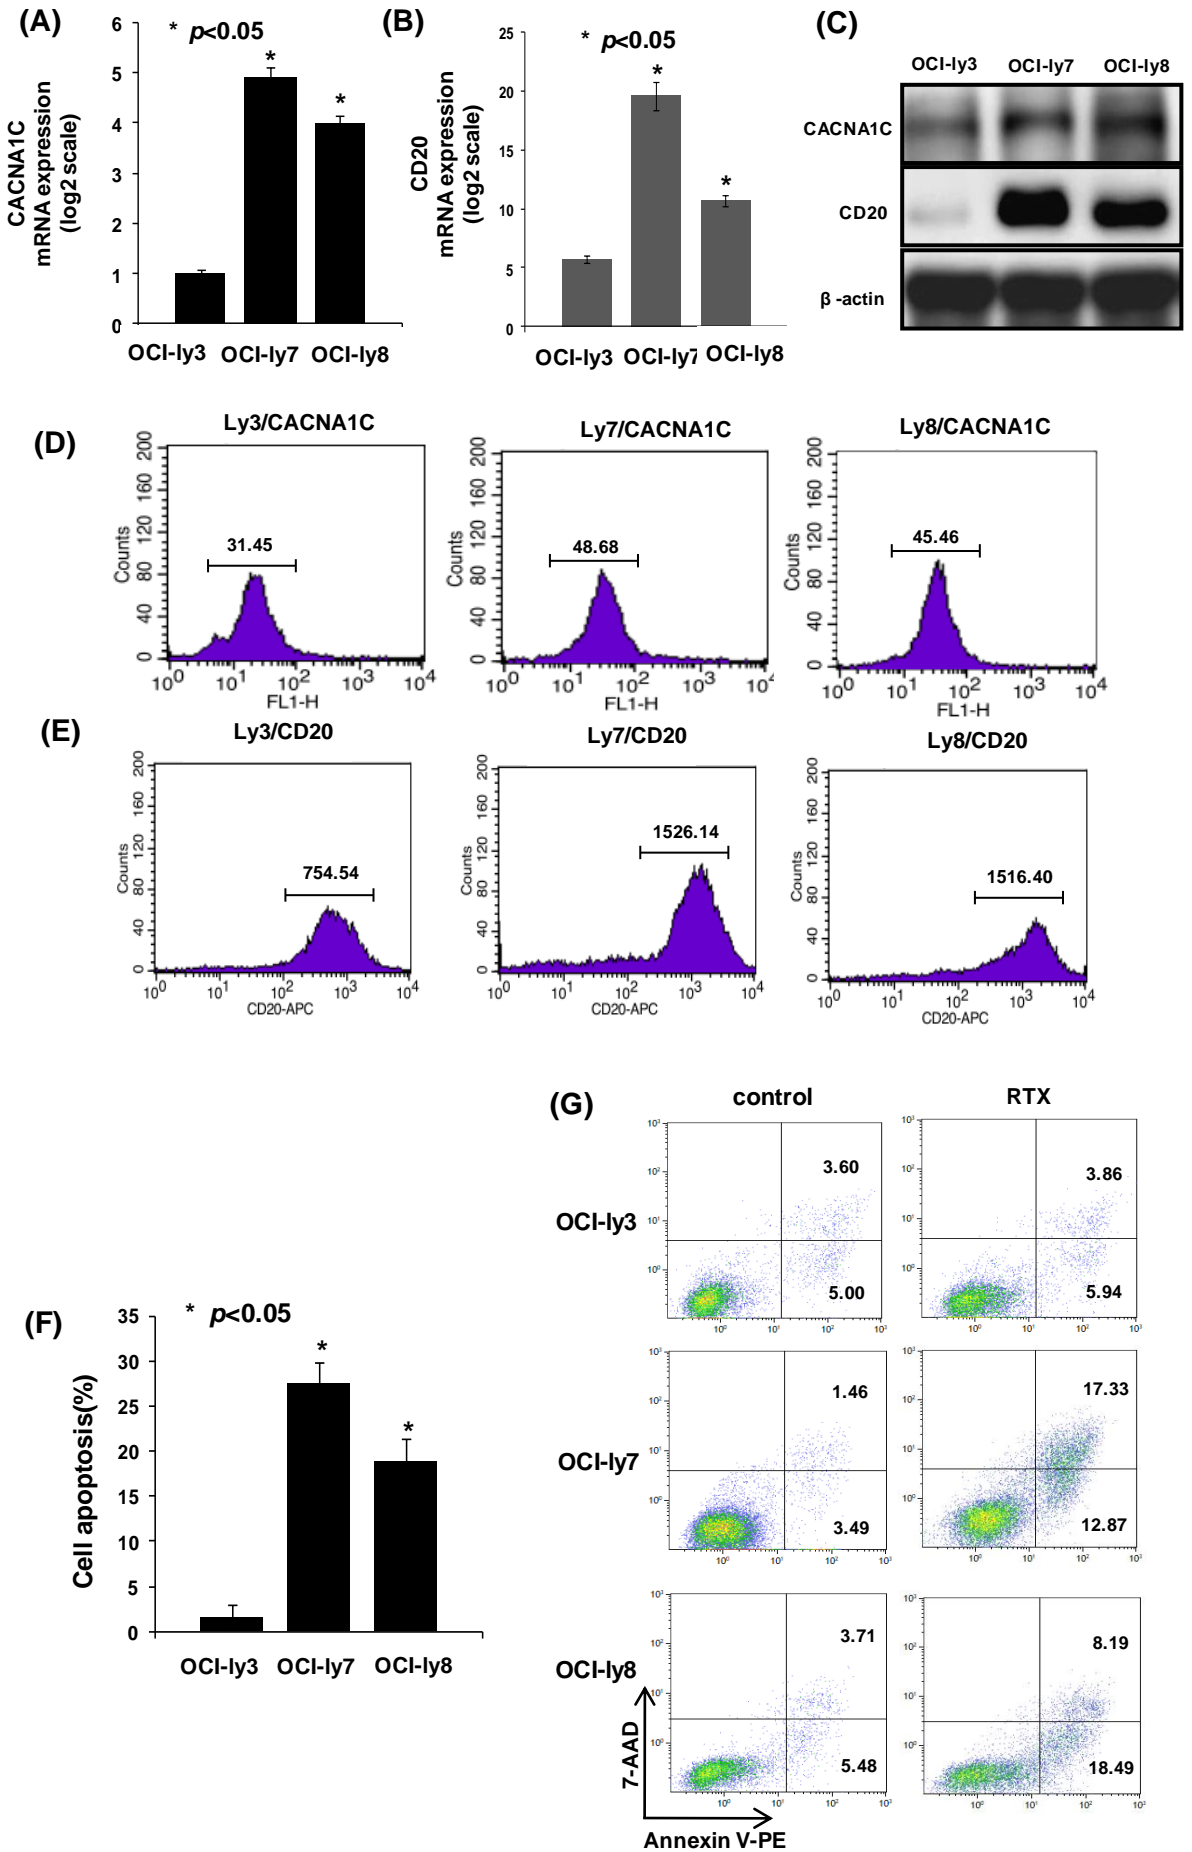

Supplement: NIHMS1777895-supplement-4.pdf [file NIHMS1777895-supplement-4.pdf]

# Supplementary Figure S5

(A)

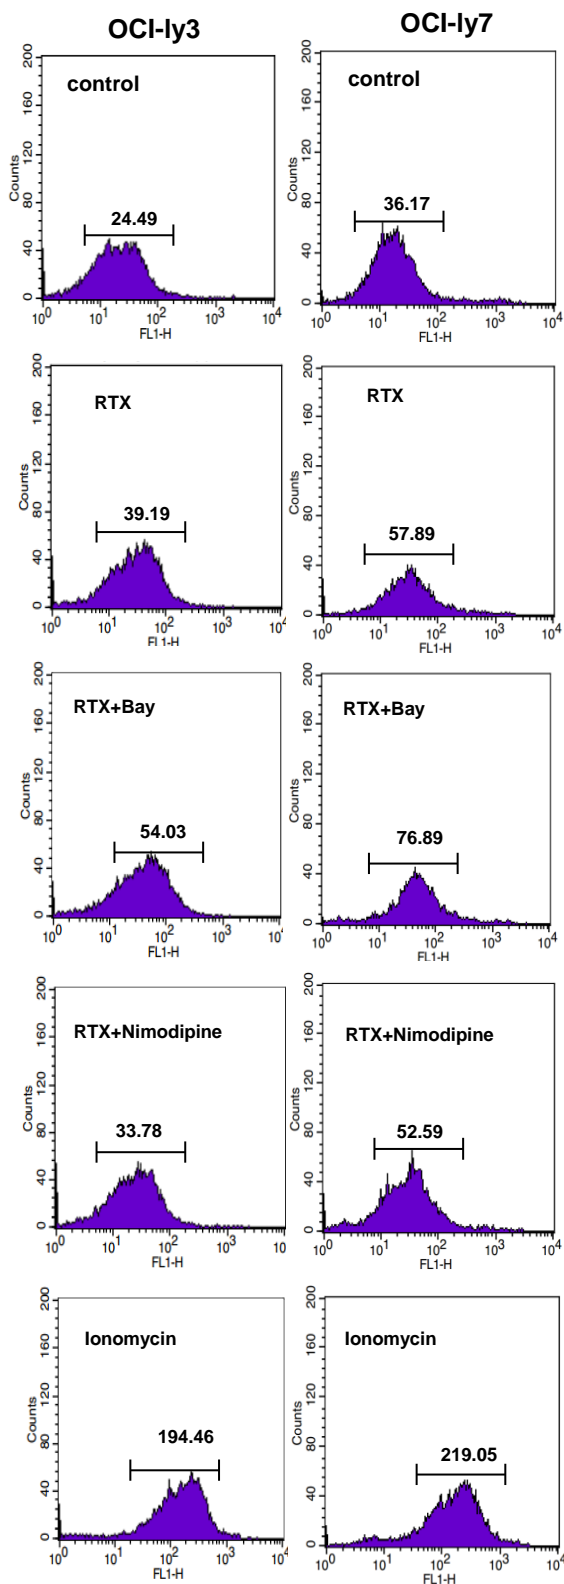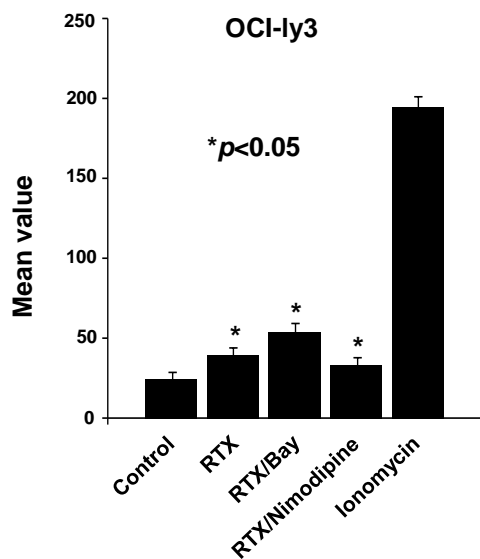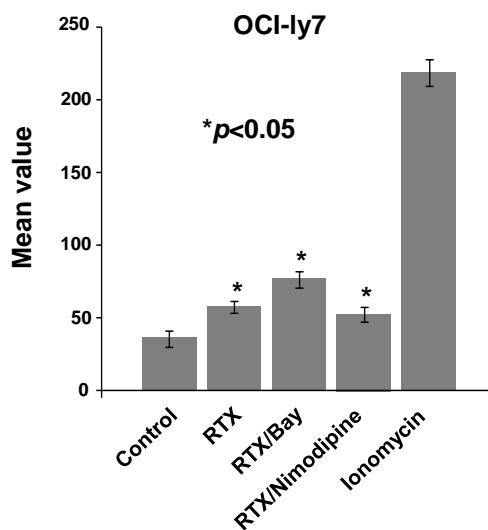

(B)

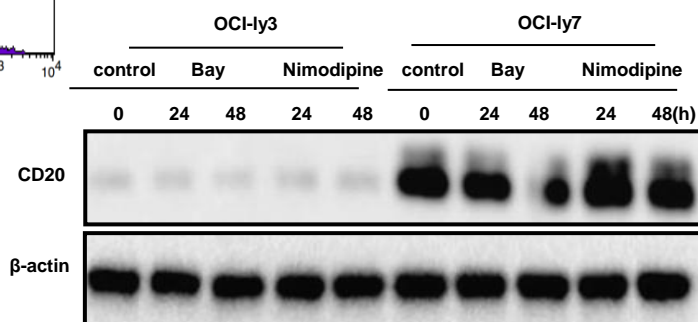

Supplement: NIHMS1777895-supplement-5.pdf [file NIHMS1777895-supplement-5.pdf]

# Supplementary Figure S6

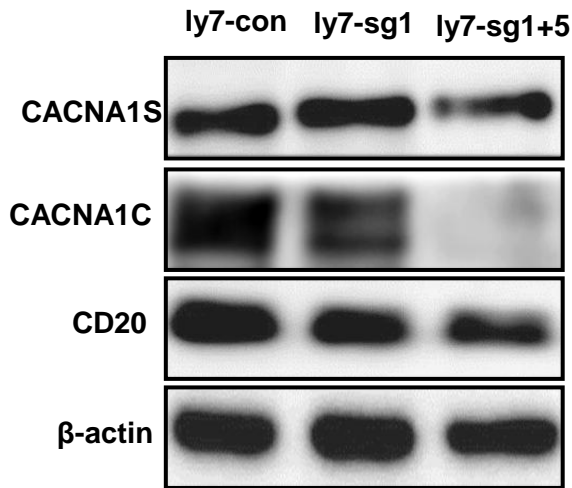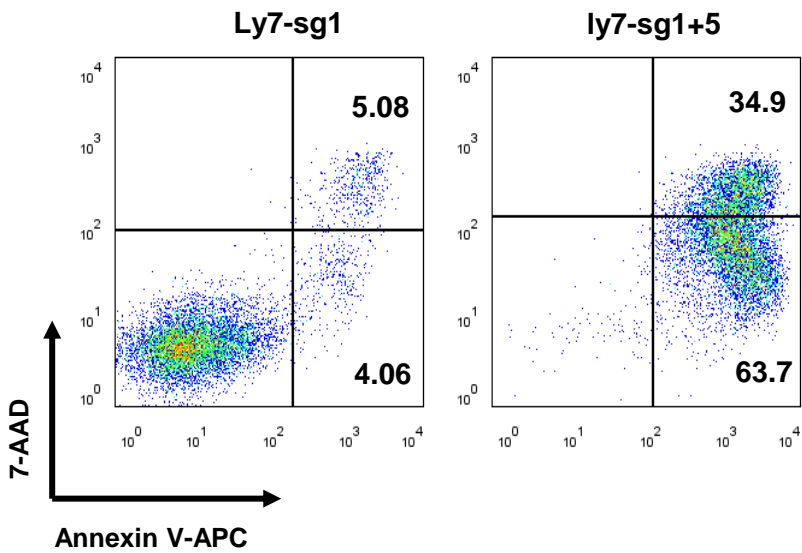

Supplement: NIHMS1777895-supplement-6.pdf [file NIHMS1777895-supplement-6.pdf]
